# Supplementary material for: The Impact of Antipsychotic Dose Reduction on Clinical Outcomes and Health Care Resource Use Among Medicare Patients with Schizophrenia
Source: PubMed Central journal article supplement — Clin Drug Investig. 2021 Sep 4;41(10):853–63. doi: 10.1007/s40261-021-01060-3 (PMC8481169; doi:10.1007/s40261-021-01060-3), 2021-09-04
Supplement: 40261_2021_1060_MOESM1_ESM.pdf [file 40261_2021_1060_MOESM1_ESM.pdf]

## **Online Resource 1**

### **The Impact of Antipsychotic Dose Reduction on Clinical Outcomes and Health Care Resource Use Among Medicare Patients With Schizophrenia**

Miriam L. Zichlin, MPH<sup>1</sup>; Fan Mu, MBBS, PhD<sup>1</sup>; Sam Leo, PharmD<sup>2</sup>; Rajeev Ayyagari, PhD<sup>1</sup>

<sup>1</sup>Analysis Group, Inc., Boston, MA, USA; <sup>2</sup>Teva Pharmaceuticals, Parsippany, NJ, USA.

#### **Corresponding author:**

Email: [Rajeev.ayyagari@analysisgroup.com](mailto:Rajeev.ayyagari@analysisgroup.com)

#### **Journal:**

*Clinical Drug Investigation*

#### **Caption:**

Additional tables and figures that show baseline characteristics and outcomes for patients in the  $\geq 10\%$  and  $\geq 30\%$  dose reduction and stable dose cohorts, stratified by age ( $< 65$  years and  $\geq 65$  years). A patient selection flow diagram is also included.

**Table 1. Dose Distribution for Ten Most Frequently Used Antipsychotics During Stable Dose Period in the  $\geq 10\%$  and  $\geq 30\%$  Dose Reduction Cohorts (Full Population)**

| Drug                | $\geq 10\%$ dose reduction cohorts |                            | $\geq 30\%$ dose reduction cohorts |                            |
|---------------------|------------------------------------|----------------------------|------------------------------------|----------------------------|
|                     | Dose reduction<br>(n=276,030)      | Stable dose<br>(n=276,030) | Dose reduction<br>(n=211,575)      | Stable dose<br>(n=211,575) |
| Risperidone, n (%)  | 63,307 (22.9)                      | 60,804 (22.0)              | 50,141 (23.7)                      | 46,689 (22.1)              |
| Mean (SD) dose, mg  | 3.9 (2.5)                          | 2.9 (2.2)                  | 3.7 (2.5)                          | 2.8 (2.2)                  |
| Quetiapine, n (%)   | 58,845 (21.3)                      | 56,643 (20.5)              | 46,347 (21.9)                      | 43,672 (20.6)              |
| Mean (SD) dose, mg  | 400.8 (285.3)                      | 271.4 (245.7)              | 383.3 (282.4)                      | 268.2 (244.7)              |
| Olanzapine, n (%)   | 49,276 (17.9)                      | 45,828 (16.6)              | 37,304 (17.6)                      | 34,926 (16.5)              |
| Mean (SD) dose, mg  | 18.9 (10.0)                        | 13.8 (8.6)                 | 18.7 (10.5)                        | 13.6 (8.6)                 |
| Aripiprazole, n (%) | 23,415 (8.5)                       | 36,037 (13.1)              | 18,572 (8.8)                       | 27,397 (12.9)              |
| Mean (SD) dose, mg  | 18.7 (10.4)                        | 14.3 (10.0)                | 18.4 (10.8)                        | 14.2 (9.9)                 |
| Clozapine, n (%)    | 21,690 (7.9)                       | 10,617 (3.8)               | 12,688 (6.0)                       | 8,002 (3.8)                |
| Mean (SD) dose, mg  | 394.6 (184.1)                      | 383.3 (190.3)              | 377.8 (186.5)                      | 382.7 (189.3)              |
| Ziprasidone, n (%)  | 14,406 (5.2)                       | 13,348 (4.8)               | 10,930 (5.2)                       | 10,133 (4.8)               |
| Mean (SD) dose, mg  | 141.9 (61.5)                       | 112.2 (56.7)               | 138.3 (63.7)                       | 111.9 (56.6)               |
| Haloperidol, n (%)  | 14,347 (5.2)                       | 13,626 (4.9)               | 11,339 (5.4)                       | 10,699 (5.1)               |
| Mean (SD) dose, mg  | 13.7 (11.5)                        | 9.9 (9.3)                  | 13.3 (11.3)                        | 9.9 (9.4)                  |
| Fluphenazine, n (%) | 6,055 (2.2)                        | 5,805 (2.1)                | 4,940 (2.3)                        | 4,526 (2.1)                |
| Mean (SD) dose, mg  | 17.4 (11.7)                        | 12.5 (9.8)                 | 16.8 (11.3)                        | 12.4 (9.8)                 |
| Lurasidone, n (%)   | 5,578 (2.0)                        | 10,143 (3.7)               | 4,485 (2.1)                        | 7,657 (3.6)                |
| Mean (SD) dose, mg  | 92.7 (39.6)                        | 69.2 (37.8)                | 89.5 (39.4)                        | 69.2 (37.9)                |

|                     |             |             |             |             |
|---------------------|-------------|-------------|-------------|-------------|
| Paliperidone, n (%) | 4,351 (1.6) | 6,194 (2.2) | 3,649 (1.7) | 4,659 (2.2) |
| Mean (SD) dose, mg  | 9.0 (3.6)   | 7.2 (3.0)   | 8.5 (3.6)   | 7.2 (3.0)   |

SD, standard deviation.

**Table 2. Baseline Demographics of ≥10% Dose Reduction Cohorts Stratified by Age**

| Characteristic                                         | <65 Years                     |                            | ≥65 Years                    |                           |
|--------------------------------------------------------|-------------------------------|----------------------------|------------------------------|---------------------------|
|                                                        | Dose reduction<br>(n=189,386) | Stable dose<br>(n=189,386) | Dose reduction<br>(n=86,644) | Stable dose<br>(n=86,644) |
| Age, years, mean (SD) <sup>a</sup>                     | 48.4 (10.6)                   | 48.4 (10.6)                | 74.5 (7.7)                   | 74.5 (7.8)                |
| Schizophrenia duration, months, mean (SD) <sup>a</sup> | 33.2 (21.3)                   | 24.6 (21.7)                | 31.7 (21.5)                  | 21.1 (21.0)               |
| Sex, male, n (%)                                       | 106,758 (56.4)                | 106,758 (56.4)             | 30,576 (35.3)                | 30,576 (35.3)             |
| Duration of follow-up, months, mean (SD) <sup>a</sup>  | 4.9 (6.9)                     | 9.2 (8.8)                  | 5.4 (7.0)                    | 8.9 (8.4)                 |
| Index drug class, n (%)                                |                               |                            |                              |                           |
| Typical antipsychotic                                  | 22,994 (12.1)                 | 22,994 (12.1)              | 10,948 (12.6)                | 10,948 (12.6)             |
| Atypical antipsychotic                                 | 166,392 (87.9)                | 166,392 (87.9)             | 75,696 (87.4)                | 75,696 (87.4)             |
| Index year, n (%)                                      |                               |                            |                              |                           |
| 2011                                                   | 13,070 (6.9)                  | 13,070 (6.9)               | 5,062 (5.8)                  | 5,062 (5.8)               |
| 2012                                                   | 29,313 (15.5)                 | 29,313 (15.5)              | 12,835 (14.8)                | 12,835 (14.8)             |
| 2013                                                   | 30,041 (15.9)                 | 30,041 (15.9)              | 12,696 (14.7)                | 12,696 (14.7)             |
| 2014                                                   | 30,033 (15.9)                 | 30,033 (15.9)              | 12,773 (14.7)                | 12,773 (14.7)             |
| 2015                                                   | 29,010 (15.3)                 | 29,010 (15.3)              | 13,135 (15.2)                | 13,135 (15.2)             |
| 2016                                                   | 29,028 (15.3)                 | 29,028 (15.3)              | 14,182 (16.4)                | 14,182 (16.4)             |
| 2017                                                   | 28,891 (15.3)                 | 28,891 (15.3)              | 15,961 (18.4)                | 15,961 (18.4)             |
| <b>Comorbidity profile, n (%)</b>                      |                               |                            |                              |                           |
| Substance-related and addictive disorders <sup>a</sup> | 61,457 (32.5)                 | 70,715 (37.3)              | 11,051 (12.8)                | 13,908 (16.1)             |
| Anxiety disorders <sup>a</sup>                         | 50,410 (26.6)                 | 57,210 (30.2)              | 25,183 (29.1)                | 29,042 (33.5)             |
| Bipolar disorders <sup>a</sup>                         | 62,700 (33.1)                 | 67,997 (35.9)              | 21,631 (25.0)                | 22,416 (25.9)             |
| Depressive disorders <sup>a</sup>                      | 62,043 (32.8)                 | 70,993 (37.5)              | 35,960 (41.5)                | 40,281 (46.5)             |
| Personality disorders <sup>a</sup>                     | 11,314 (6.0)                  | 11,855 (6.3)               | 2,112 (2.4)                  | 2,586 (3.0)               |

|                                                                         |                           |                           |                            |                            |
|-------------------------------------------------------------------------|---------------------------|---------------------------|----------------------------|----------------------------|
| Schizophrenia-spectrum disorders (excluding schizophrenia) <sup>a</sup> | 30,613 (16.2)             | 36,375 (19.2)             | 20,179 (23.3)              | 24,258 (28.0)              |
| Sleep-wake disorders <sup>a</sup>                                       | 30,845 (16.3)             | 33,594 (17.7)             | 12,523 (14.5)              | 15,258 (17.6)              |
| TD                                                                      | 1,386 (0.7) <sup>b</sup>  | 1,152 (0.6) <sup>b</sup>  | 1,392 (1.6)                | 1,336 (1.5)                |
| Trauma- and stressor-related disorders <sup>a</sup>                     | 16,396 (8.7)              | 18,665 (9.9)              | 3,613 (4.2)                | 4,615 (5.3)                |
| <b>Mean (SD) CCI score<sup>a</sup></b>                                  | 0.9 (1.5)                 | 1.0 (1.6)                 | 2.2 (2.0)                  | 2.3 (2.2)                  |
| AIDS/HIV, n (%) <sup>a</sup>                                            | 2,548 (1.3)               | 3,247 (1.7)               | 264 (0.3)                  | 391 (0.5)                  |
| Cancer, n (%) <sup>a</sup>                                              | 5,044 (2.7)               | 5,474 (2.9)               | 5,973 (6.9)                | 6,732 (7.8)                |
| Cerebrovascular disease, n (%)                                          | 11,831 (6.2)              | 12,017 (6.3)              | 16,797 (19.4) <sup>b</sup> | 18,367 (21.2) <sup>b</sup> |
| Congestive heart failure, n (%) <sup>a</sup>                            | 11,586 (6.1)              | 12,704 (6.7)              | 17,908 (20.7)              | 19,574 (22.6)              |
| Chronic pulmonary disease, n (%) <sup>a</sup>                           | 47,778 (25.2)             | 50,301 (26.6)             | 28,441 (32.8)              | 29,908 (34.5)              |
| Dementia, n (%) <sup>a</sup>                                            | 7,159 (3.8)               | 6,123 (3.2)               | 32,636 (37.7)              | 31,510 (36.4)              |
| Diabetes with chronic complication, n (%)                               | 15,732 (8.3) <sup>b</sup> | 15,385 (8.1) <sup>b</sup> | 14,400 (16.6)              | 14,230 (16.4)              |
| Diabetes without chronic complication, n (%) <sup>a</sup>               | 39,407 (20.8)             | 37,749 (19.9)             | 24,360 (28.1)              | 23,844 (27.5)              |
| Hemiplegia or paraplegia, n (%)                                         | 4,238 (2.2)               | 4,092 (2.2)               | 2,388 (2.8) <sup>b</sup>   | 2,613 (3.0) <sup>b</sup>   |
| Mild liver disease, n (%) <sup>a</sup>                                  | 10,985 (5.8)              | 12,043 (6.4)              | 3,344 (3.9)                | 3,907 (4.5)                |
| Metastatic solid tumor, n (%) <sup>a</sup>                              | 927 (0.5)                 | 1,373 (0.7)               | 924 (1.1)                  | 1,350 (1.6)                |
| Myocardial infarction, n (%) <sup>a</sup>                               | 3,863 (2.0)               | 5,001 (2.6)               | 3,508 (4.0)                | 4,809 (5.6)                |
| Moderate or severe liver disease, n (%)                                 | 1,247 (0.7) <sup>b</sup>  | 1,456 (0.8) <sup>b</sup>  | 561 (0.6)                  | 625 (0.7)                  |
| Peptic ulcer disease, n (%) <sup>a</sup>                                | 2,196 (1.2)               | 2,496 (1.3)               | 1,510 (1.7)                | 1,831 (2.1)                |
| Peripheral vascular disease, n (%) <sup>a</sup>                         | 17,239 (9.1)              | 15,030 (7.9)              | 29,476 (34.0)              | 26,247 (30.3)              |
| Renal disease, n (%)                                                    | 11,634 (6.1)              | 11,658 (6.2)              | 14,396 (16.6) <sup>b</sup> | 15,687 (18.1) <sup>b</sup> |
| Rheumatic disease, n (%) <sup>a</sup>                                   | 3,449 (1.8)               | 4,145 (2.2)               | 2,337 (2.7)                | 2,867 (3.3)                |
| <b>Additional psychiatric medications, n (%)</b>                        |                           |                           |                            |                            |
| ADHD medication <sup>a</sup>                                            | 6,749 (3.6)               | 7,440 (3.9)               | 727 (0.8)                  | 909 (1.0)                  |

|                                 |                |                |               |               |
|---------------------------------|----------------|----------------|---------------|---------------|
| Anticholinergic <sup>a</sup>    | 48,581 (25.7)  | 42,937 (22.7)  | 14,148 (16.3) | 11,202 (12.9) |
| Antidepressant <sup>a</sup>     | 117,873 (62.2) | 121,616 (64.2) | 53,288 (61.5) | 53,720 (62.0) |
| Anxiety medication <sup>a</sup> | 51,946 (27.4)  | 56,081 (29.6)  | 21,625 (25.0) | 24,092 (27.8) |
| Mood stabilizer <sup>a</sup>    | 87,384 (46.1)  | 82,263 (43.4)  | 34,040 (39.3) | 30,737 (35.5) |
| Sedative <sup>a</sup>           | 20,554 (10.9)  | 23,811 (12.6)  | 7,302 (8.4)   | 9,333 (10.8)  |

ADHD, attention-deficit hyperactivity disorder; AIDS, acquired immunodeficiency syndrome;

CCI, Charlson Comorbidity Index; HIV, human immunodeficiency virus; SD, standard deviation; TD, tardive dyskinesia.

<sup>a</sup> $P < 0.05$  for dose reduction vs stable dose in both dose reduction cohorts.

<sup>b</sup> $P < 0.05$  for dose reduction vs stable dose only in the indicated dose reduction cohort.

**Table 3. Baseline Demographics of  $\geq 30\%$  Dose Reduction Cohorts Stratified by Age**

| Characteristic                                         | <65 Years                     |                            | $\geq 65$ Years              |                           |
|--------------------------------------------------------|-------------------------------|----------------------------|------------------------------|---------------------------|
|                                                        | Dose reduction<br>(n=142,991) | Stable dose<br>(n=142,991) | Dose reduction<br>(n=68,584) | Stable dose<br>(n=68,584) |
| Age, years, mean (SD) <sup>a</sup>                     | 48.4 (10.6)                   | 48.4 (10.6)                | 74.7 (7.8)                   | 74.7 (7.8)                |
| Schizophrenia duration, months, mean (SD) <sup>a</sup> | 32.9 (21.2)                   | 24.7 (21.7)                | 31.2 (21.3)                  | 21.1 (21.0)               |
| Sex, male, n (%)                                       | 79,831 (55.8)                 | 79,831 (55.8)              | 23,986 (35.0)                | 23,986 (35.0)             |
| Duration of follow-up, months, mean (SD) <sup>a</sup>  | 4.2 (6.5)                     | 9.2 (8.8)                  | 5.0 (6.8)                    | 8.9 (8.4)                 |
| Index drug class, n (%)                                |                               |                            |                              |                           |
| Typical antipsychotic                                  | 17,906 (12.5)                 | 17,906 (12.5)              | 8,642 (12.6)                 | 8,642 (12.6)              |
| Atypical antipsychotic                                 | 125,085 (87.5)                | 125,085 (87.5)             | 59,942 (87.4)                | 59,942 (87.4)             |
| Index year, n (%)                                      |                               |                            |                              |                           |
| 2011                                                   | 9,624 (6.7)                   | 9,624 (6.7)                | 3,979 (5.8)                  | 3,979 (5.8)               |
| 2012                                                   | 21,935 (15.3)                 | 21,935 (15.3)              | 10,194 (14.9)                | 10,194 (14.9)             |
| 2013                                                   | 22,727 (15.9)                 | 22,727 (15.9)              | 10,131 (14.8)                | 10,131 (14.8)             |
| 2014                                                   | 22,783 (15.9)                 | 22,783 (15.9)              | 10,143 (14.8)                | 10,143 (14.8)             |
| 2015                                                   | 21,900 (15.3)                 | 21,900 (15.3)              | 10,382 (15.1)                | 10,382 (15.1)             |
| 2016                                                   | 22,009 (15.4)                 | 22,009 (15.4)              | 11,165 (16.3)                | 11,165 (16.3)             |
| 2017                                                   | 22,013 (15.4)                 | 22,013 (15.4)              | 12,590 (18.4)                | 12,590 (18.4)             |
| <b>Comorbidity profile, n (%)</b>                      |                               |                            |                              |                           |
| Substance-related and addictive disorders <sup>a</sup> | 47,927 (33.5)                 | 53,507 (37.4)              | 8,862 (12.9)                 | 10,834 (15.8)             |
| Anxiety disorders <sup>a</sup>                         | 39,662 (27.7)                 | 43,471 (30.4)              | 20,372 (29.7)                | 22,989 (33.5)             |
| Bipolar disorders <sup>a</sup>                         | 48,850 (34.2)                 | 51,375 (35.9)              | 17,223 (25.1)                | 17,621 (25.7)             |
| Depressive disorders <sup>a</sup>                      | 48,815 (34.1)                 | 53,800 (37.6)              | 29,135 (42.5)                | 31,910 (46.5)             |
| Personality disorders <sup>a</sup>                     | 8,742 (6.1)                   | 8,997 (6.3)                | 1,668 (2.4)                  | 2,049 (3.0)               |
| Schizophrenia-spectrum disorders (excluding            | 23,913 (16.7)                 | 27,436 (19.2)              | 16,398 (23.9)                | 19,326 (28.2)             |

|                                                           |                            |                            |               |               |
|-----------------------------------------------------------|----------------------------|----------------------------|---------------|---------------|
| schizophrenia) <sup>a</sup>                               |                            |                            |               |               |
| Sleep-wake disorders <sup>a</sup>                         | 24,102 (16.9)              | 25,509 (17.8)              | 10,110 (14.7) | 12,043 (17.6) |
| TD                                                        | 1,036 (0.7) <sup>b</sup>   | 880 (0.6) <sup>b</sup>     | 1,058 (1.5)   | 1,049 (1.5)   |
| Trauma- and stressor-related disorders <sup>a</sup>       | 12,974 (9.1)               | 14,218 (9.9)               | 2,956 (4.3)   | 3,644 (5.3)   |
| <b>Mean (SD) CCI score<sup>a</sup></b>                    | 1.0 (1.6)                  | 1.0 (1.6)                  | 2.3 (2.1)     | 2.4 (2.2)     |
| AIDS/HIV, n (%) <sup>a</sup>                              | 2,032 (1.4)                | 2,449 (1.7)                | 223 (0.3)     | 311 (0.5)     |
| Cancer, n (%) <sup>a</sup>                                | 3,870 (2.7)                | 4,184 (2.9)                | 4,731 (6.9)   | 5,368 (7.8)   |
| Cerebrovascular disease, n (%) <sup>a</sup>               | 9,467 (6.6)                | 9,110 (6.4)                | 13,689 (20.0) | 14,601 (21.3) |
| Congestive heart failure, n (%) <sup>a</sup>              | 9,320 (6.5)                | 9,646 (6.7)                | 14,604 (21.3) | 15,514 (22.6) |
| Chronic pulmonary disease, n (%) <sup>a</sup>             | 37,160 (26.0)              | 38,134 (26.7)              | 22,700 (33.1) | 23,637 (34.5) |
| Dementia, n (%) <sup>a</sup>                              | 5,627 (3.9)                | 4,664 (3.3)                | 26,523 (38.7) | 25,262 (36.8) |
| Diabetes with chronic complication, n (%) <sup>a</sup>    | 12,175 (8.5)               | 11,621 (8.1)               | 11,515 (16.8) | 11,173 (16.3) |
| Diabetes without chronic complication, n (%) <sup>a</sup> | 29,789 (20.8)              | 28,514 (19.9)              | 19,292 (28.1) | 18,867 (27.5) |
| Hemiplegia or paraplegia, n (%) <sup>a</sup>              | 3,353 (2.3)                | 3,067 (2.1)                | 1,933 (2.8)   | 2,059 (3.0)   |
| Mild liver disease, n (%) <sup>a</sup>                    | 8,591 (6.0)                | 9,097 (6.4)                | 2,718 (4.0)   | 2,996 (4.4)   |
| Metastatic solid tumor, n (%) <sup>a</sup>                | 724 (0.5)                  | 1,018 (0.7)                | 756 (1.1)     | 1,063 (1.5)   |
| Myocardial infarction, n (%) <sup>a</sup>                 | 3,131 (2.2)                | 3,770 (2.6)                | 2,899 (4.2)   | 3,814 (5.6)   |
| Moderate or severe liver disease, n (%)                   | 1,020 (0.7) <sup>b</sup>   | 1,127 (0.8) <sup>b</sup>   | 470 (0.7)     | 484 (0.7)     |
| Peptic ulcer disease, n (%) <sup>a</sup>                  | 1,747 (1.2)                | 1,897 (1.3)                | 1,237 (1.8)   | 1,424 (2.1)   |
| Peripheral vascular disease, n (%) <sup>a</sup>           | 13,374 (9.4)               | 11,374 (8.0)               | 23,587 (34.4) | 20,800 (30.3) |
| Renal disease, n (%) <sup>a</sup>                         | 9,113 (6.4)                | 8,828 (6.2)                | 11,605 (16.9) | 12,457 (18.2) |
| Rheumatic disease, n (%) <sup>a</sup>                     | 2,720 (1.9)                | 3,168 (2.2)                | 1,891 (2.8)   | 2,259 (3.3)   |
| <b>Additional psychiatric medications, n (%)</b>          |                            |                            |               |               |
| ADHD medication <sup>a</sup>                              | 5,263 (3.7)                | 5,580 (3.9)                | 573 (0.8)     | 724 (1.1)     |
| Anticholinergic <sup>a</sup>                              | 36,338 (25.4)              | 32,385 (22.6)              | 10,862 (15.8) | 8,813 (12.8)  |
| Antidepressant                                            | 90,307 (63.2) <sup>b</sup> | 92,076 (64.4) <sup>b</sup> | 42,470 (61.9) | 42,534 (62.0) |



|                                 |               |               |               |               |
|---------------------------------|---------------|---------------|---------------|---------------|
| Anxiety medication <sup>a</sup> | 40,216 (28.1) | 42,644 (29.8) | 17,302 (25.2) | 19,103 (27.9) |
| Mood stabilizer <sup>a</sup>    | 66,703 (46.6) | 62,175 (43.5) | 26,879 (39.2) | 24,254 (35.4) |
| Sedative <sup>a</sup>           | 16,248 (11.4) | 18,087 (12.6) | 5,971 (8.7)   | 7,384 (10.8)  |

ADHD, attention-deficit hyperactivity disorder; AIDS, acquired immunodeficiency syndrome;

CCI, Charlson Comorbidity Index; HIV, human immunodeficiency virus; SD, standard deviation; TD, tardive dyskinesia.

<sup>a</sup> $P < 0.05$  for dose reduction vs stable dose in both dose reduction cohorts.

<sup>b</sup> $P < 0.05$  for dose reduction vs stable dose only in the indicated dose reduction cohort.

**Table 4. Dose Distribution for Ten Most Frequently Used Antipsychotics During Stable Dose Period in the  $\geq 10\%$  Dose Reduction Cohort Stratified by Age**

| Drug                | <65 Years                     |                            | $\geq 65$ Years              |                           |
|---------------------|-------------------------------|----------------------------|------------------------------|---------------------------|
|                     | Dose reduction<br>(n=189,386) | Stable dose<br>(n=189,386) | Dose reduction<br>(n=86,644) | Stable dose<br>(n=86,644) |
| Risperidone, n (%)  | 39,259 (20.7)                 | 38,267 (20.2)              | 24,048 (27.8)                | 22,537 (26.0)             |
| Mean (SD) dose, mg  | 4.6 (2.5)                     | 3.4 (2.2)                  | 2.7 (2.1)                    | 1.9 (1.8)                 |
| Quetiapine, n (%)   | 38,253 (20.2)                 | 35,909 (19.0)              | 20,592 (23.8)                | 20,734 (23.9)             |
| Mean (SD) dose, mg  | 476.8 (282.3)                 | 331.0 (256.0)              | 259.6 (232.0)                | 168.2 (186.2)             |
| Olanzapine, n (%)   | 31,817 (16.8)                 | 29,119 (15.4)              | 17,459 (20.2)                | 16,709 (19.3)             |
| Mean (SD) dose, mg  | 21.3 (9.7)                    | 15.8 (8.7)                 | 14.5 (8.9)                   | 10.3 (7.3)                |
| Aripiprazole, n (%) | 17,144 (9.1)                  | 27,159 (14.3)              | 6,271 (7.2)                  | 8,878 (10.2)              |
| Mean (SD) dose, mg  | 20.2 (10.2)                   | 15.3 (10.0)                | 14.5 (9.9)                   | 11.2 (9.5)                |
| Clozapine, n (%)    | 18,554 (9.8)                  | 9,163 (4.8)                | 3,136 (3.6)                  | 1,454 (1.7)               |
| Mean (SD) dose, mg  | 409.0 (181.9)                 | 401.4 (185.1)              | 309.4 (173.7)                | 269.8 (183.5)             |
| Ziprasidone, n (%)  | 11,803 (6.2)                  | 10,649 (5.6)               | 2,603 (3.0)                  | 2,699 (3.1)               |
| Mean (SD) dose, mg  | 147.6 (60.9)                  | 117.9 (56.0)               | 115.7 (56.9)                 | 89.7 (53.5)               |
| Haloperidol, n (%)  | 9,836 (5.2)                   | 9,552 (5.0)                | 4,511 (5.2)                  | 4,074 (4.7)               |
| Mean (SD) dose, mg  | 15.9 (11.8)                   | 11.4 (9.5)                 | 8.9 (9.2)                    | 6.3 (7.7)                 |
| Fluphenazine, n (%) | 4,358 (2.3)                   | 4,245 (2.2)                | 1,697 (2.0)                  | 1,560 (1.8)               |
| Mean (SD) dose, mg  | 18.8 (11.7)                   | 13.5 (10.0)                | 13.7 (11.0)                  | 9.7 (8.7)                 |
| Lurasidone, n (%)   | 4,833 (2.6)                   | 8,741 (4.6)                | 745 (0.9)                    | 1,402 (1.6)               |
| Mean (SD) dose, mg  | 94.8 (39.4)                   | 70.9 (38.0)                | 79.0 (38.3)                  | 58.7 (34.9)               |

|                     |             |             |           |           |
|---------------------|-------------|-------------|-----------|-----------|
| Paliperidone, n (%) | 3,679 (1.9) | 5,287 (2.8) | 672 (0.8) | 907 (1.0) |
| Mean (SD) dose, mg  | 9.2 (3.5)   | 7.4 (3.0)   | 7.6 (3.3) | 6.1 (3.1) |

SD, standard deviation.

**Table 5. Dose Distribution for Ten Most Frequently Used Antipsychotics During Stable Dose Period in the  $\geq 30\%$  Dose Reduction Cohort Stratified by Age**

| Drug                | <65 Years                     |                            | $\geq 65$ Years              |                           |
|---------------------|-------------------------------|----------------------------|------------------------------|---------------------------|
|                     | Dose reduction<br>(n=142,991) | Stable dose<br>(n=142,991) | Dose reduction<br>(n=68,584) | Stable dose<br>(n=68,584) |
| Risperidone, n (%)  | 30,490 (21.3)                 | 28,785 (20.1)              | 19,651 (28.7)                | 17,904 (26.1)             |
| Mean (SD) dose, mg  | 4.4 (2.5)                     | 3.4 (2.2)                  | 2.6 (2.1)                    | 1.9 (1.8)                 |
| Quetiapine, n (%)   | 29,773 (20.8)                 | 28,785 (20.1)              | 16,574 (24.2)                | 16,515 (24.1)             |
| Mean (SD) dose, mg  | 459.5 (281.8)                 | 329.7 (255.7)              | 246.5 (226.2)                | 167.1 (185.6)             |
| Olanzapine, n (%)   | 23,883 (16.7)                 | 21,714 (15.2)              | 13,421 (19.6)                | 13,212 (19.3)             |
| Mean (SD) dose, mg  | 21.4 (10.2)                   | 15.7 (8.6)                 | 13.8 (9.2)                   | 10.3 (7.3)                |
| Aripiprazole, n (%) | 13,615 (9.5)                  | 20,403 (14.3)              | 4,957 (7.2)                  | 6,994 (10.2)              |
| Mean (SD) dose, mg  | 20.0 (10.7)                   | 15.2 (9.9)                 | 14.1 (10.2)                  | 11.1 (9.1)                |
| Clozapine, n (%)    | 10,690 (7.5)                  | 6,849 (4.8)                | 1,998 (2.9)                  | 1,153 (1.7)               |
| Mean (SD) dose, mg  | 393.1 (185.0)                 | 402.0 (183.9)              | 296.1 (172.7)                | 268.1 (180.0)             |
| Ziprasidone, n (%)  | 8,903 (6.2)                   | 8,051 (5.6)                | 2,027 (3.0)                  | 2,082 (3.0)               |
| Mean (SD) dose, mg  | 144.7 (63.3)                  | 118.0 (55.7)               | 110.3 (57.7)                 | 88.5 (53.7)               |
| Haloperidol, n (%)  | 7,724 (5.4)                   | 7,484 (5.2)                | 3,615 (5.3)                  | 3,215 (4.7)               |
| Mean (SD) dose, mg  | 15.5 (11.7)                   | 11.5 (9.6)                 | 8.6 (8.9)                    | 6.3 (7.7)                 |
| Fluphenazine, n (%) | 3,573 (2.5)                   | 3,302 (2.3)                | 1,367 (2.0)                  | 1,224 (1.8)               |
| Mean (SD) dose, mg  | 18.2 (11.3)                   | 13.4 (10.0)                | 13.2 (10.2)                  | 9.7 (8.6)                 |
| Lurasidone, n (%)   | 3,872 (2.7)                   | 6,577 (4.6)                | 613 (0.9)                    | 1,080 (1.6)               |
| Mean (SD) dose, mg  | 91.8 (39.2)                   | 71.0 (38.1)                | 75.2 (37.5)                  | 58.3 (34.8)               |

|                     |             |             |           |           |
|---------------------|-------------|-------------|-----------|-----------|
| Paliperidone, n (%) | 3,074 (2.1) | 3,951 (2.8) | 575 (0.8) | 708 (1.0) |
| Mean (SD) dose, mg  | 8.8 (3.6)   | 7.4 (3.0)   | 7.3 (3.2) | 6.0 (3.0) |

SD, standard deviation.

**Table 6. Multivariable Cox Regression Analyses of the Effects of  $\geq 10\%$  Antipsychotic Dose Reductions Stratified by Age<sup>a</sup>**

| Outcome                                             | <65 Years |             |                | $\geq 65$ Years |             |                |
|-----------------------------------------------------|-----------|-------------|----------------|-----------------|-------------|----------------|
|                                                     | HR        | 95% CI      | <i>P</i> value | HR              | 95% CI      | <i>P</i> value |
| All-cause ER visit                                  | 1.12      | (1.11–1.14) | <0.001         | 0.96            | (0.95–0.98) | <0.001         |
| All-cause inpatient visit                           | 1.35      | (1.33–1.37) | <0.001         | 1.01            | (0.99–1.03) | 0.159          |
| Schizophrenia relapse                               | 1.30      | (1.28–1.32) | <0.001         | 1.09            | (1.06–1.12) | <0.001         |
| Other psychiatric relapse (excluding schizophrenia) | 1.19      | (1.17–1.20) | <0.001         | 1.00            | (0.98–1.02) | 0.800          |
| TD diagnosis <sup>b</sup>                           | 1.53      | (1.37–1.71) | <0.001         | 1.31            | (1.17–1.47) | <0.001         |

ADHD, attention-deficit hyperactivity disorder; CCI, Charlson Comorbidity Index; CI, confidence interval; ER, emergency room; HR, hazard ratio; TD, tardive dyskinesia.

<sup>a</sup>Covariates included age; disease duration; CCI; substance-related and addictive, anxiety, bipolar and related, depressive, personality, schizophrenia spectrum (excluding schizophrenia), sleep-wake, trauma-related, and stressor-related disorders; TD; psychotherapy; antidepressants; anticholinergics; sedatives; mood stabilizers; anxiety medications; and ADHD medications.

<sup>b</sup>Patients with TD during the 6-month period prior to the index date were excluded from the TD analyses. For the dose reduction cohort, the index date was defined as the date of the initial dose reduction. For the stable dose cohort, the index date was defined as the date of the first prescription fill after the first stable dose monotherapy period of  $\geq 90$  days.

**Table 7. Multivariable Cox Regression Analyses of the Effects of  $\geq 30\%$  Antipsychotic Dose Reductions Stratified by Age<sup>a</sup>**

| Outcome                                             | <65 Years |             |         | $\geq 65$ Years |             |         |
|-----------------------------------------------------|-----------|-------------|---------|-----------------|-------------|---------|
|                                                     | HR        | 95% CI      | P value | HR              | 95% CI      | P value |
| All-cause ER visit                                  | 1.16      | (1.14–1.18) | <0.001  | 0.99            | (0.97–1.01) | 0.211   |
| All-cause inpatient visit                           | 1.40      | (1.38–1.43) | <0.001  | 1.04            | (1.02–1.06) | <0.001  |
| Schizophrenia relapse                               | 1.32      | (1.29–1.35) | <0.001  | 1.08            | (1.05–1.11) | <0.001  |
| Other psychiatric relapse (excluding schizophrenia) | 1.23      | (1.21–1.25) | <0.001  | 1.02            | (1.00–1.05) | 0.071   |
| TD diagnosis <sup>b</sup>                           | 1.47      | (1.29–1.68) | <0.001  | 1.29            | (1.13–1.46) | <0.001  |

ADHD, attention-deficit hyperactivity disorder; CCI, Charlson Comorbidity Index; CI, confidence interval; ER, emergency room; HR, hazard ratio; TD, tardive dyskinesia.

<sup>a</sup>Covariates included age; disease duration; CCI; substance-related and addictive, anxiety, bipolar and related, depressive, personality, schizophrenia spectrum (excluding schizophrenia), sleep-wake, trauma-related, and stressor-related disorders; TD; psychotherapy; antidepressants; anticholinergics; sedatives; mood stabilizers; anxiety medications; and ADHD medications.

<sup>b</sup>Patients with TD during the 6-month period prior to the index date were excluded from the TD analyses. For the dose reduction cohort, the index date was defined as the date of the initial dose reduction. For the stable dose cohort, the index date was defined as the date of the first prescription fill after the first stable dose monotherapy period of  $\geq 90$  days.

**Fig. 1 Patient Selection Flow Diagram**

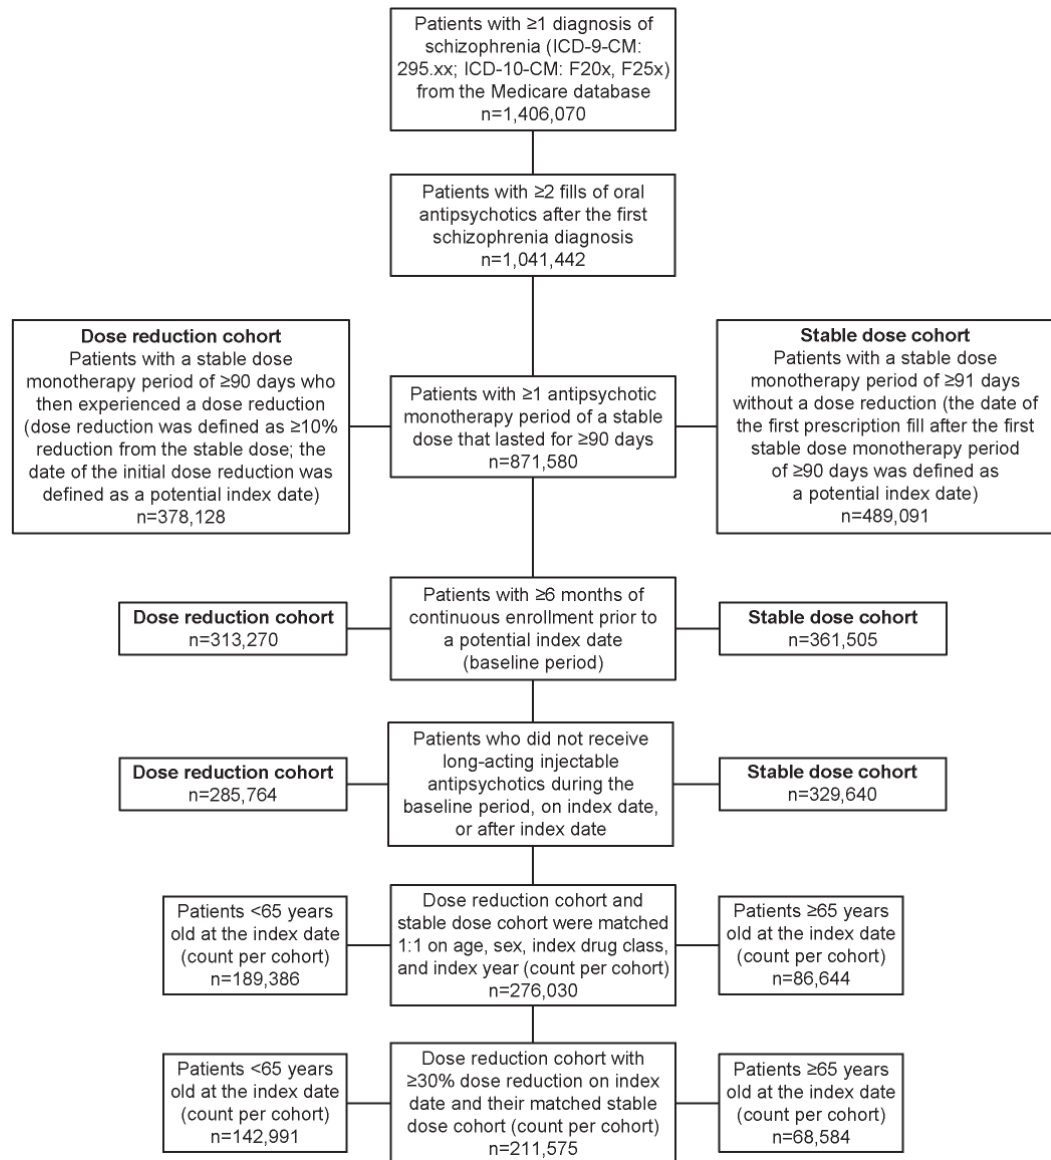

ICD-9-CM, *International Classification of Diseases, Ninth Revision, Clinical Modification*;  
 ICD-10-CM, *International Classification of Diseases, Tenth Revision, Clinical Modification*.



**Fig. 2 Time to All-Cause ER Visit With  $\geq 10\%$  and  $\geq 30\%$  Dose Reductions Stratified by Age**

**A.  $\geq 10\%$  Dose Reduction (<65 Years)**

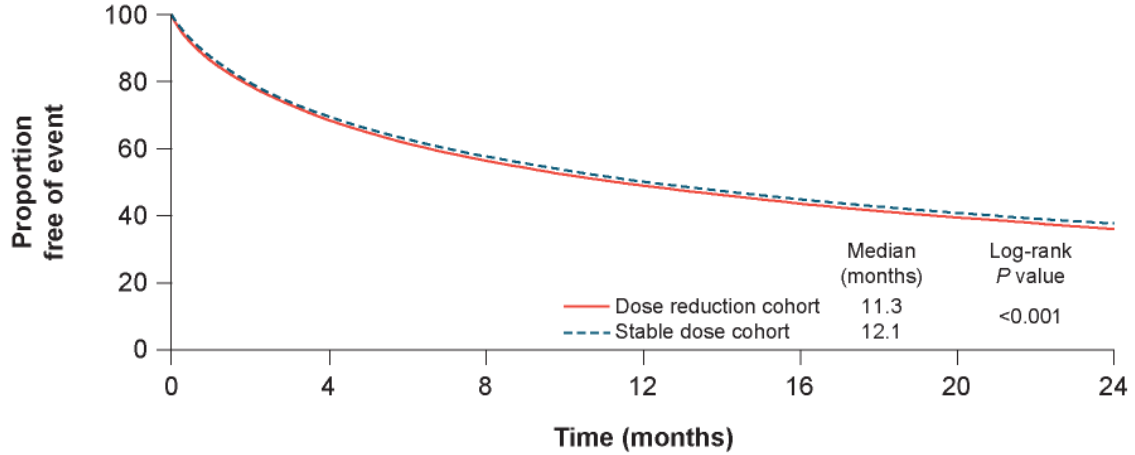

| n at risk             |         | 0      | 4      | 8      | 12     | 16     | 20     | 24 |
|-----------------------|---------|--------|--------|--------|--------|--------|--------|----|
| Dose reduction cohort | 189,386 | 44,071 | 25,306 | 16,683 | 11,849 | 8,700  | 6,481  |    |
| Stable dose cohort    | 189,386 | 81,474 | 51,870 | 37,154 | 28,161 | 22,005 | 17,532 |    |

**B.  $\geq 10\%$  Dose Reduction ( $\geq 65$  Years)**

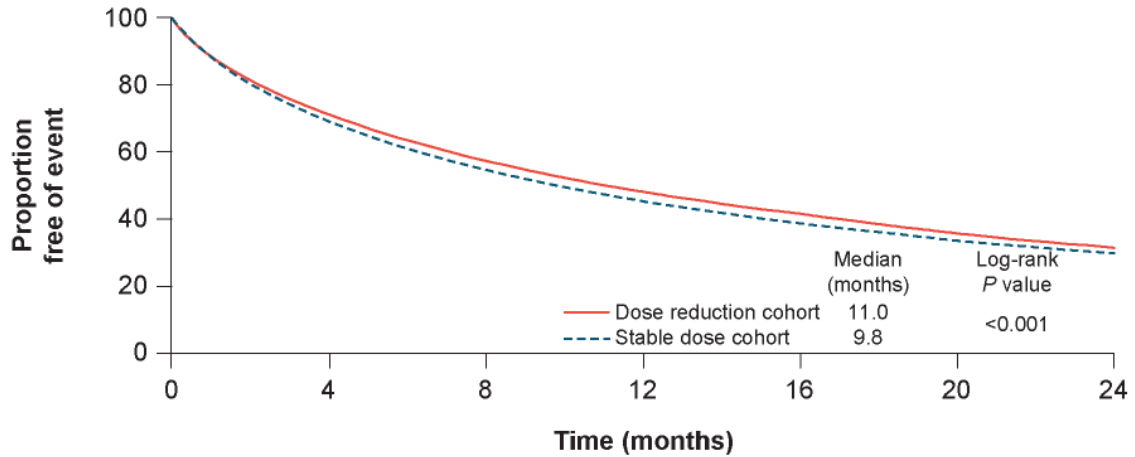

| n at risk             |        | 0      | 4      | 8      | 12     | 16    | 20    | 24 |
|-----------------------|--------|--------|--------|--------|--------|-------|-------|----|
| Dose reduction cohort | 86,644 | 24,532 | 13,508 | 8,356  | 5,488  | 3,642 | 2,509 |    |
| Stable dose cohort    | 86,644 | 38,421 | 22,985 | 15,247 | 10,802 | 7,801 | 5,841 |    |

**C.  $\geq 30\%$  Dose Reduction (<65 Years)**

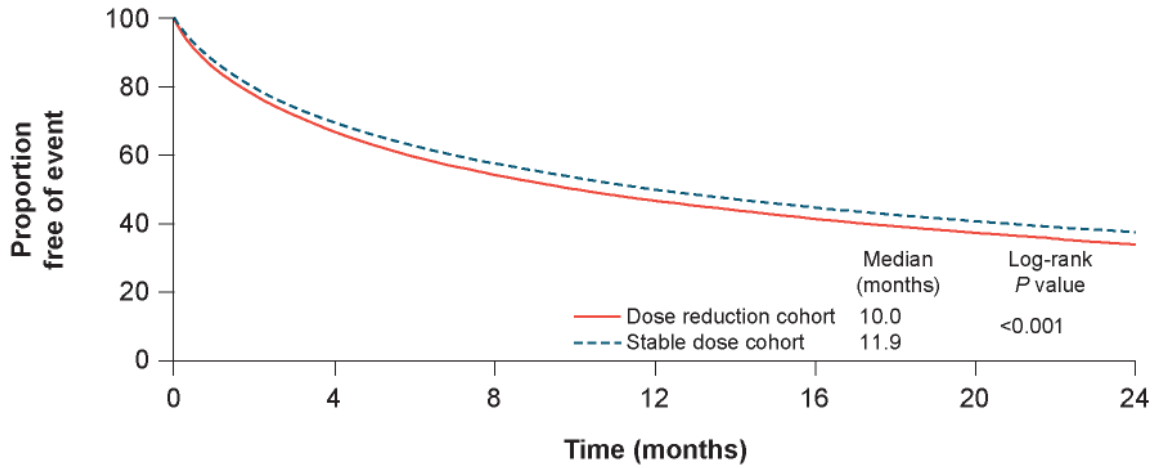

|                       | n at risk |        |        |        |        |        |        |
|-----------------------|-----------|--------|--------|--------|--------|--------|--------|
| Dose reduction cohort | 142,991   | 28,578 | 15,856 | 10,234 | 7,147  | 5,194  | 3,846  |
| Stable dose cohort    | 142,991   | 61,334 | 38,900 | 27,801 | 21,029 | 16,444 | 13,092 |

**D.  $\geq 30\%$  Dose Reduction ( $\geq 65$  Years)**

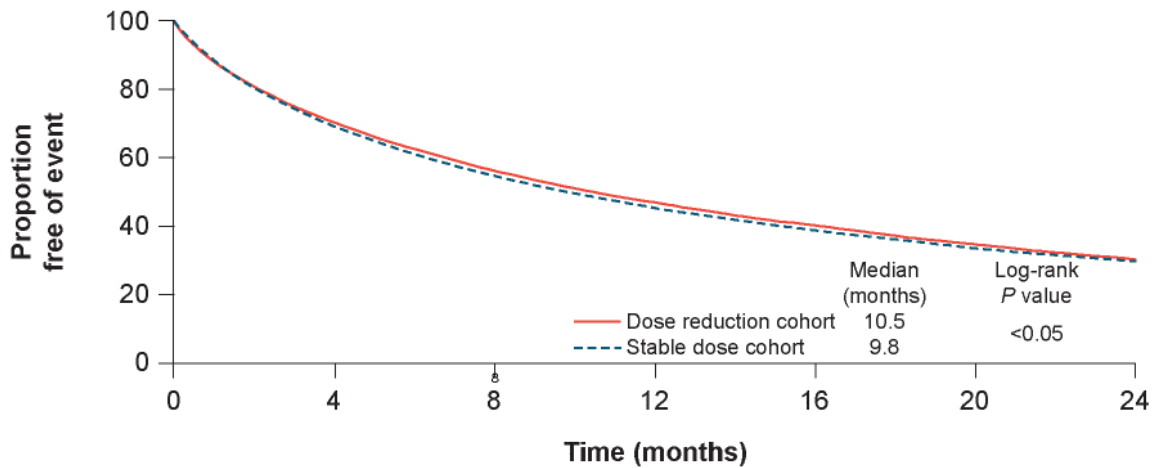

|                       | n at risk |        |        |        |       |       |       |
|-----------------------|-----------|--------|--------|--------|-------|-------|-------|
| Dose reduction cohort | 68,584    | 18,117 | 9,779  | 5,985  | 3,863 | 2,561 | 1,736 |
| Stable dose cohort    | 68,584    | 30,401 | 18,148 | 12,015 | 8,502 | 6,147 | 4,601 |

ER, emergency room.

*Descriptive caption:* These are Kaplan-Meier graphs describing the time to all-cause ER visit for the  $\geq 10\%$  and  $\geq 30\%$  dose reduction and stable dose cohorts stratified by age (<65 years vs  $\geq 65$  years). The x-axis represents time in months at an interval of 4 months, and the y-axis represents proportion of patients free of event. Patients aged <65 years had a median time to all-cause ER

visit of 11.3 months in the  $\geq 10\%$  dose reduction cohort and 12.1 months in the stable dose cohort ( $P < 0.001$ ). Patients aged  $\geq 65$  years had a median time to all-cause ER visit of 11.0 months in the  $\geq 10\%$  dose reduction cohort and 9.8 months for the stable dose cohort ( $P < 0.001$ ). Patients aged  $< 65$  years had a median time to all-cause ER visit of 10.0 months in the  $\geq 30\%$  dose reduction cohort and 11.9 months in the stable dose cohort for ( $P < 0.001$ ). Patients aged  $\geq 65$  years had a median time to all-cause ER visit of 10.5 months in the  $\geq 30\%$  dose reduction cohort and 9.8 months in the stable dose cohort ( $P < 0.05$ ).

**Fig. 3 Time to All-Cause Inpatient Visit With  $\geq 10\%$  and  $\geq 30\%$  Dose Reductions Stratified by Age**

**A.  $\geq 10\%$  Dose Reduction (<65 Years)**

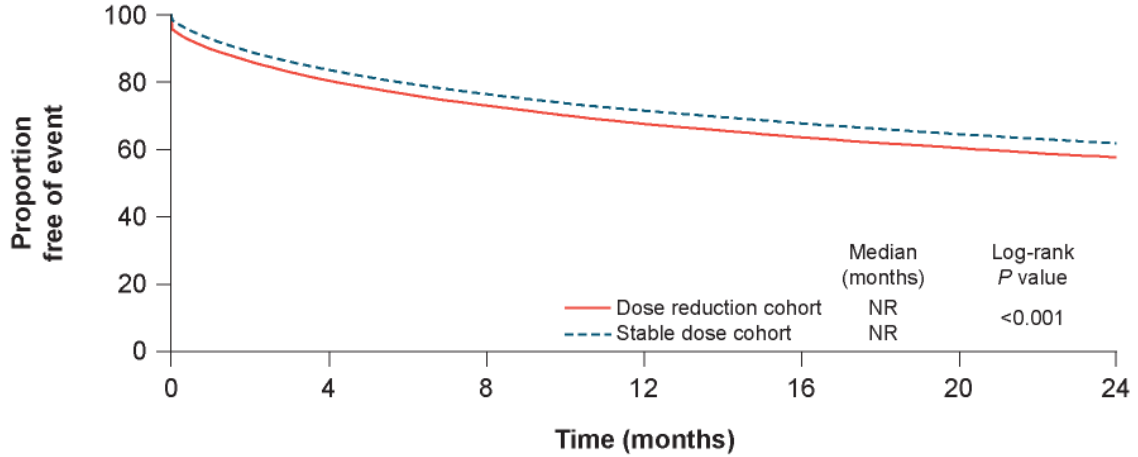

| n at risk             |         | 0      | 4      | 8      | 12     | 16     | 20     | 24 |
|-----------------------|---------|--------|--------|--------|--------|--------|--------|----|
| Dose reduction cohort | 189,386 | 51,219 | 31,880 | 22,034 | 16,295 | 12,383 | 9,512  |    |
| Stable dose cohort    | 189,386 | 96,815 | 66,500 | 50,349 | 39,760 | 32,086 | 26,159 |    |

**B.  $\geq 10\%$  Dose Reduction ( $\geq 65$  Years)**

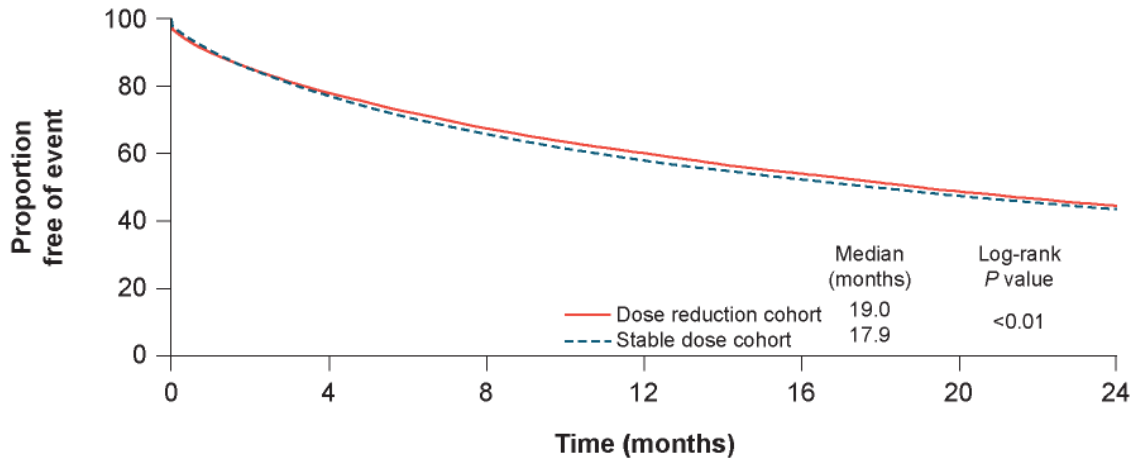

| n at risk             |        | 0      | 4      | 8      | 12     | 16     | 20    | 24 |
|-----------------------|--------|--------|--------|--------|--------|--------|-------|----|
| Dose reduction cohort | 86,644 | 26,783 | 15,691 | 10,220 | 7,000  | 4,890  | 3,475 |    |
| Stable dose cohort    | 86,644 | 42,994 | 27,543 | 19,219 | 14,240 | 10,691 | 8,183 |    |

**C.  $\geq 30\%$  Dose Reduction (<65 Years)**

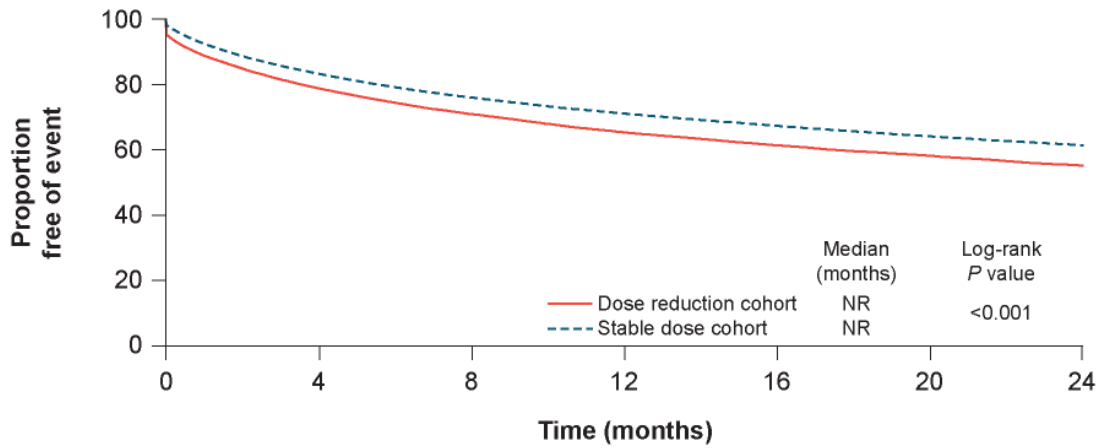

|                       | n at risk |        |        |        |        |        |        |
|-----------------------|-----------|--------|--------|--------|--------|--------|--------|
| Dose reduction cohort | 142,991   | 33,487 | 20,204 | 13,668 | 9,970  | 7,498  | 5,708  |
| Stable dose cohort    | 142,991   | 72,929 | 49,892 | 37,744 | 29,713 | 23,933 | 19,485 |

**D.  $\geq 30\%$  Dose Reduction ( $\geq 65$  Years)**

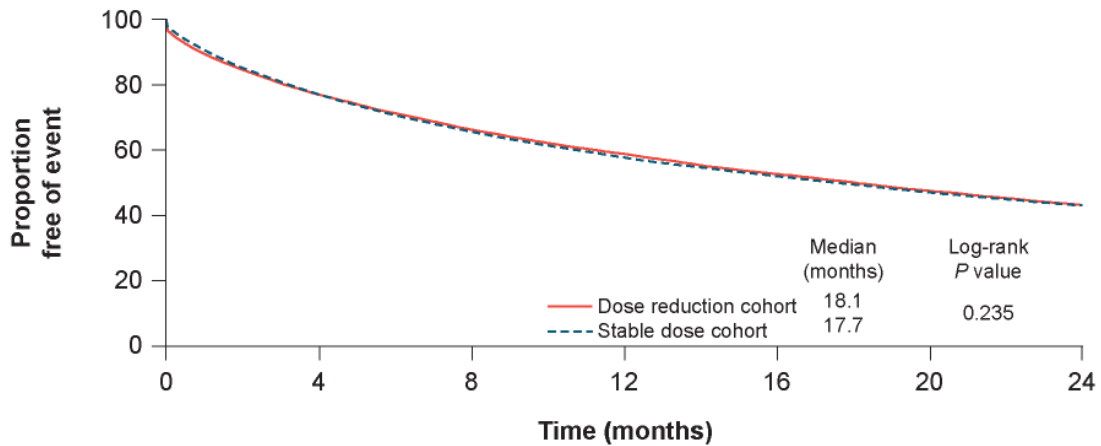

|                       | n at risk |        |        |        |        |       |       |
|-----------------------|-----------|--------|--------|--------|--------|-------|-------|
| Dose reduction cohort | 68,584    | 19,767 | 11,412 | 7,371  | 4,993  | 3,479 | 2,438 |
| Stable dose cohort    | 68,584    | 34,043 | 21,723 | 15,136 | 11,169 | 8,369 | 6,408 |

NR, not reached.

*Descriptive caption:* These are Kaplan-Meier graphs describing the time to all-cause inpatient visit for the  $\geq 10\%$  and  $\geq 30\%$  dose reduction and stable dose cohorts stratified by age (<65 years vs  $\geq 65$  years). The x-axis represents time in months at an interval of 4 months, and the y-axis represents proportion of patients free of event. Patients aged <65 years did not reach the median time to all-cause inpatient visit in the  $\geq 10\%$  and  $\geq 30\%$  dose reduction and stable dose cohorts

( $P < 0.001$  for both comparisons). Patients aged  $\geq 65$  years had a median time to all-cause inpatient visit of 19.0 months in the  $\geq 10\%$  dose reduction cohort and 17.9 months in the stable dose cohort ( $P < 0.01$ ). Patients aged  $\geq 65$  years had a median time to all-cause inpatient visit of 18.1 months in the  $\geq 30\%$  dose reduction cohort and 17.7 months in the stable dose cohort ( $P = 0.235$ ).

**Fig. 4 Time to Schizophrenia Relapse<sup>a</sup> With  $\geq 10\%$  and  $\geq 30\%$  Dose Reductions Stratified by Age**

**A.  $\geq 10\%$  Dose Reduction (<65 Years)**

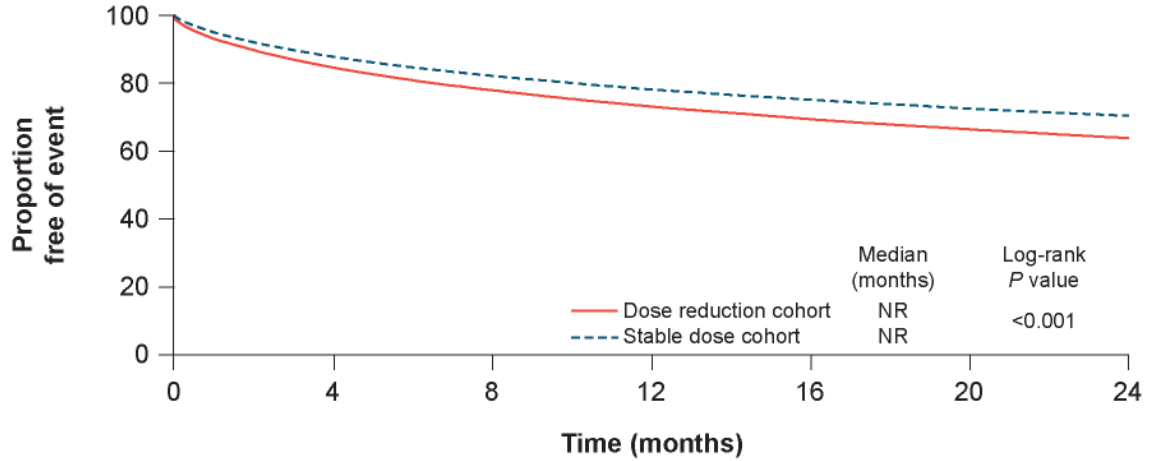

|                       | n at risk |        |        |        |        |        |        |
|-----------------------|-----------|--------|--------|--------|--------|--------|--------|
| Dose reduction cohort | 189,386   | 52,888 | 32,888 | 22,821 | 16,923 | 12,831 | 9,852  |
| Stable dose cohort    | 189,386   | 99,961 | 69,404 | 52,870 | 41,954 | 34,051 | 27,955 |

**B.  $\geq 10\%$  Dose Reduction ( $\geq 65$  Years)**

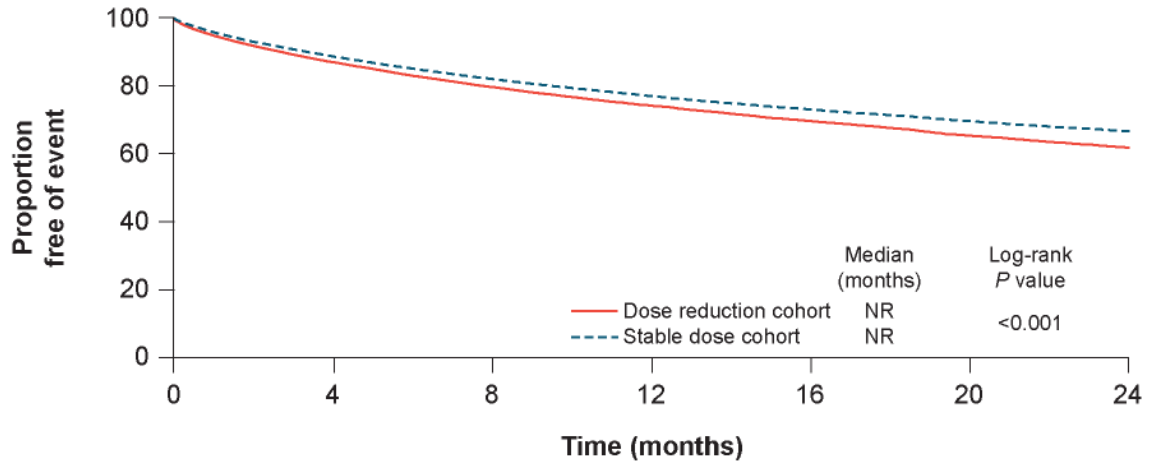

|                       | n at risk |        |        |        |        |        |        |
|-----------------------|-----------|--------|--------|--------|--------|--------|--------|
| Dose reduction cohort | 86,644    | 28,724 | 17,242 | 11,384 | 7,965  | 5,638  | 4,074  |
| Stable dose cohort    | 86,644    | 46,729 | 31,090 | 22,340 | 16,903 | 12,943 | 10,062 |

**C.  $\geq 30\%$  Dose Reduction (<65 Years)**

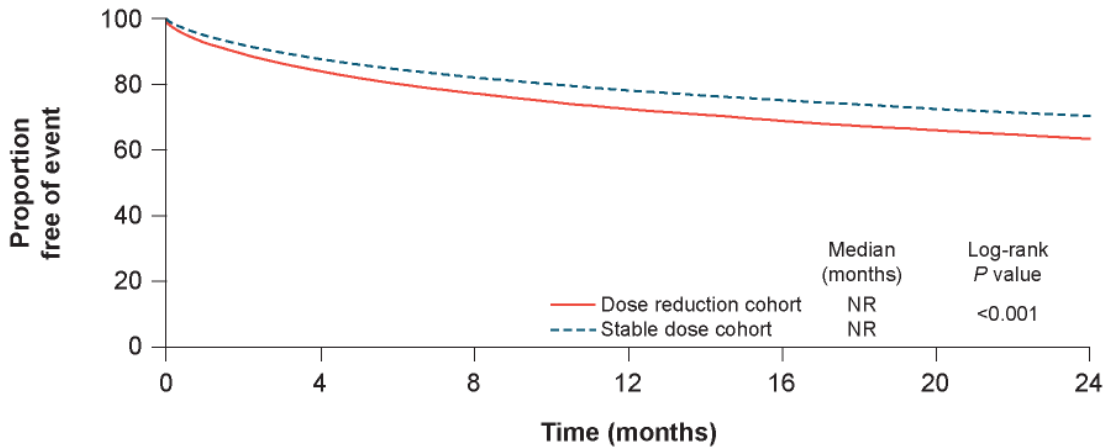

| n at risk             |         | 0      | 4      | 8      | 12     | 16     | 20     | 24 |
|-----------------------|---------|--------|--------|--------|--------|--------|--------|----|
| Dose reduction cohort | 142,991 | 34,916 | 21,135 | 14,393 | 10,540 | 7,927  | 6,059  |    |
| Stable dose cohort    | 142,991 | 75,350 | 52,191 | 39,749 | 31,487 | 25,469 | 20,883 |    |

**D.  $\geq 30\%$  Dose Reduction ( $\geq 65$  Years)**

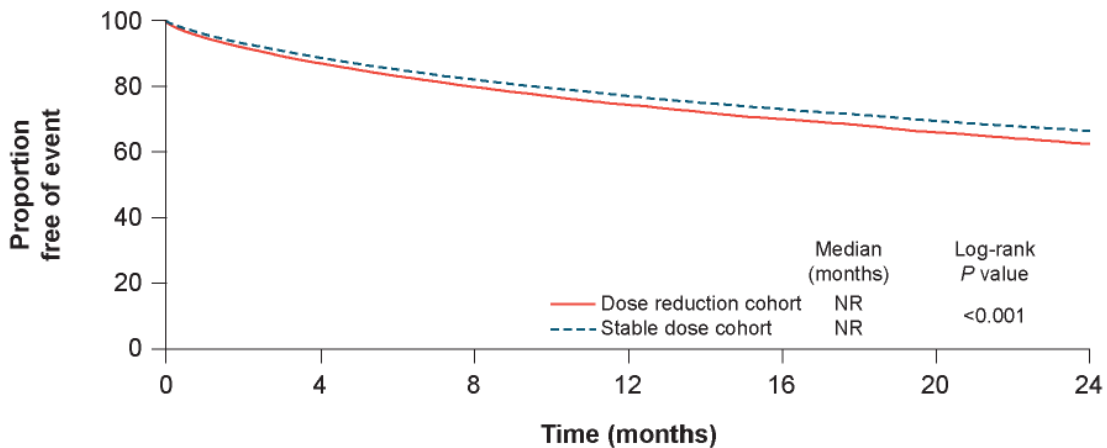

| n at risk             |        | 0      | 4      | 8      | 12     | 16     | 20    | 24 |
|-----------------------|--------|--------|--------|--------|--------|--------|-------|----|
| Dose reduction cohort | 68,584 | 21,402 | 12,697 | 8,324  | 5,796  | 4,108  | 2,934 |    |
| Stable dose cohort    | 68,584 | 36,953 | 24,529 | 17,602 | 13,261 | 10,132 | 7,890 |    |

ER, emergency room; NR, not reached.

<sup>a</sup>Schizophrenia relapse was defined as an inpatient admission or ER visit for schizophrenia.

*Descriptive caption:* These are Kaplan-Meier graphs describing the time to schizophrenia relapse for the  $\geq 10\%$  and  $\geq 30\%$  dose reduction and stable dose cohorts stratified by age (<65 years vs  $\geq 65$  years). The x-axis represents time in months at an interval of 4 months, and the y-axis represents proportion of patients free of event. Patients aged <65 years and  $\geq 65$  years did not



reach the median time to schizophrenia relapse in both the  $\geq 10\%$  and  $\geq 30\%$  dose reduction and stable dose cohorts ( $P < 0.001$  for all).

**Fig. 5 Time to Other Psychiatric Relapse (Excluding Schizophrenia)<sup>a</sup> With  $\geq 10\%$  and  $\geq 30\%$  Dose Reductions Stratified by Age**

**A.  $\geq 10\%$  Dose Reduction (<65 Years)**

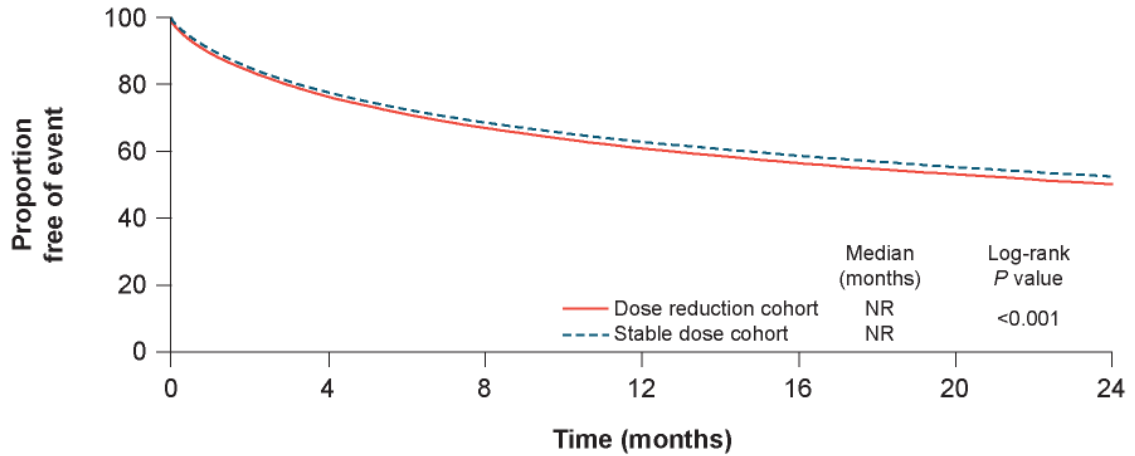

|                       | n at risk |        |        |        |        |        |        |
|-----------------------|-----------|--------|--------|--------|--------|--------|--------|
| Dose reduction cohort | 189,386   | 48,776 | 29,571 | 20,254 | 14,899 | 11,263 | 8,644  |
| Stable dose cohort    | 189,386   | 90,596 | 60,875 | 45,577 | 35,746 | 28,728 | 23,357 |

**B.  $\geq 10\%$  Dose Reduction ( $\geq 65$  Years)**

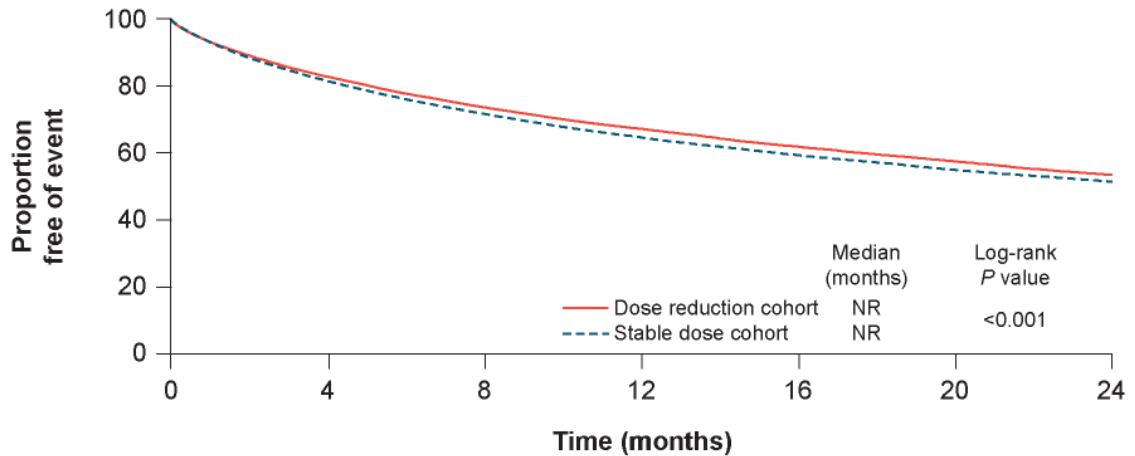

|                       | n at risk |        |        |        |        |        |       |
|-----------------------|-----------|--------|--------|--------|--------|--------|-------|
| Dose reduction cohort | 86,644    | 27,686 | 16,414 | 10,719 | 7,403  | 5,230  | 3,737 |
| Stable dose cohort    | 86,644    | 43,913 | 28,326 | 19,883 | 14,767 | 11,146 | 8,603 |

**C.  $\geq 30\%$  Dose Reduction (<65 Years)**

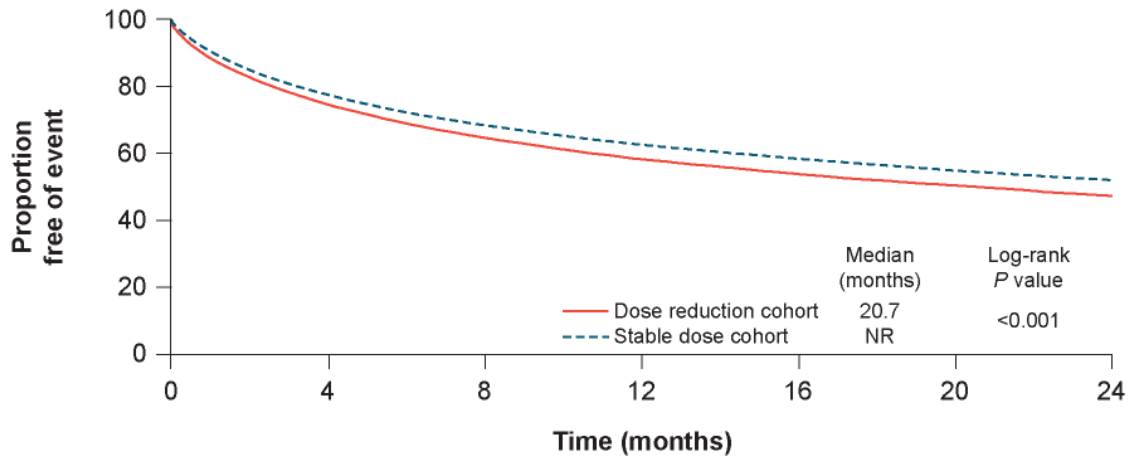

|                       | n at risk |        |        |        |        |        |        |
|-----------------------|-----------|--------|--------|--------|--------|--------|--------|
| Dose reduction cohort | 142,991   | 31,758 | 18,627 | 12,467 | 9,028  | 6,751  | 5,139  |
| Stable dose cohort    | 142,991   | 68,274 | 45,731 | 34,212 | 26,751 | 21,433 | 17,391 |

**D.  $\geq 30\%$  Dose Reduction ( $\geq 65$  Years)**

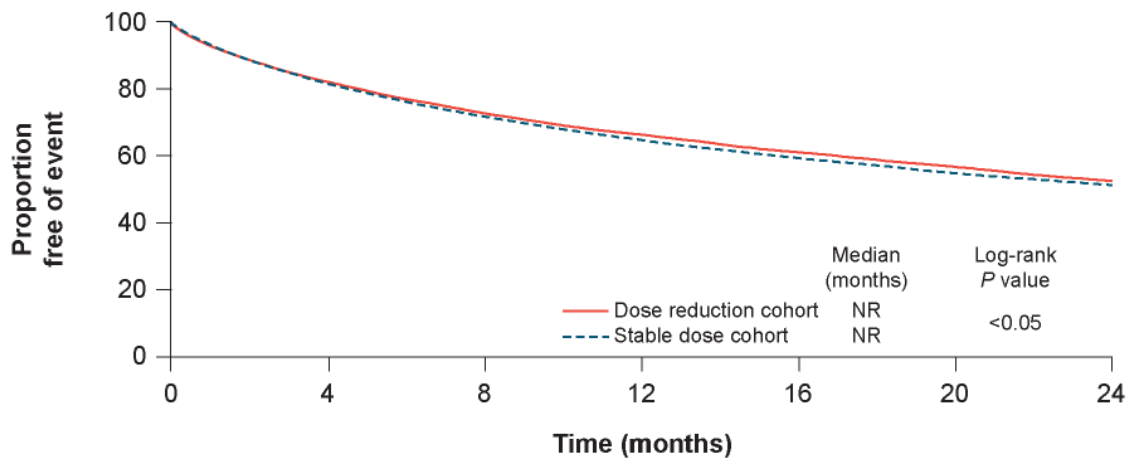

|                       | n at risk |        |        |        |        |       |       |
|-----------------------|-----------|--------|--------|--------|--------|-------|-------|
| Dose reduction cohort | 68,584    | 20,480 | 11,952 | 7,751  | 5,313  | 3,735 | 2,630 |
| Stable dose cohort    | 68,584    | 34,796 | 22,373 | 15,693 | 11,594 | 8,731 | 6,737 |

ER, emergency room; NR, not reached.

<sup>a</sup>Psychiatric relapse was defined as an inpatient admission or ER visit for psychiatric conditions, excluding schizophrenia and schizoaffective disorder.

*Descriptive caption:* These are Kaplan-Meier graphs describing the time to other psychiatric relapse, excluding schizophrenia, for the  $\geq 10\%$  and  $\geq 30\%$  dose reduction and stable dose cohorts

stratified by age (<65 years vs  $\geq 65$  years). The x-axis represents time in months at an interval of 4 months, and the y-axis represents proportion of patients free of event. Patients aged <65 years and  $\geq 65$  years did not reach the median time to other psychiatric relapse in the  $\geq 10\%$  dose reduction and stable dose cohorts ( $P < 0.001$  for both comparisons). Patients aged <65 years had a median time to other psychiatric relapse of 20.7 months in the  $\geq 30\%$  dose reduction cohort and did not reach the median time in the stable dose cohort ( $P < 0.001$ ). Patients aged  $\geq 65$  years did not reach the median time to other psychiatric relapse in the  $\geq 30\%$  dose reduction and stable dose cohorts ( $P < 0.05$ ).
